# Supplementary material
Source: publisher figshare collection journal article supplement (https://future-science-group.figshare.com/ndownloader/files/33157739)
Supplement: Supplementary file 1 [file 33157739]

### **PREVIOUS KNOWLEDGE ABOUT MALARIA**

Do you know Malaria? ( ) Yes ( ) No ( ) Don't know ( ) Did not answer

Do you know anyone who have Malaria? ( ) Yes ( ) No ( ) Don't know ( ) Did not answer

Do you know what are Malaria symptoms? ( ) Yes ( ) No ( ) Don't know ( ) Did not answer

Do you know how Malaria is transmitted? ( ) Yes ( ) No ( ) Don't know ( ) Did not answer

Do you have any practice to avoid Malaria? What? ( ) Yes ( ) No ( ) Don't know ( ) Did not answer

### **INFORMATION ABOUT MALARIA**

Interviewers should explain the following content to the participants:

Malaria is a parasitic disease, potentially fatal, and its causative agent is a protozoan, transmitted to the man through the bite of a mosquito, infected with one of the four Plasmodium that provoke the disease, that it can evolve quickly and be serious. Patients may experience fever, whether or not associated with chills, tremors, intense sweating, headaches and body aches, among other symptoms such as vomiting, diarrhea, abdominal pain, lack of appetite, dizziness and feeling tired, between 8 and 30 days after the bite of the infected mosquito, or even more, I depend on the Plasmodium species, the parasitic load injected by the mosquito at the time of the bite and the defense of the patient. The most effective measures for the prevention of Malaria are those of individual protection, aiming to prevent or reduce the possibility of human-mosquito-transmitting contact as well as avoid frequenting places near natural breeding sites mosquitoes (river banks and flooded areas) at dusk and dawn, wear pants and compressed magician shirts, use repellents, curtains and mosquito nets on the bed or hammocks, screens on doors and windows and insecticide in that goes to sleep. Malaria is preventable and curable. Children with the severe form of the disease often develop a or more of the following symptoms: severe anemia, difficulty breathing in relation to metabolic acidosis or malaria cerebral. In 2015, approximately 3.2 billion people, almost half of the world's population, were at risk of contracting malaria, especially in Africa, Asia and Latin America. In endemic areas, people can develop partial immunity, allowing asymptomatic infections to occur.

Suppose that in a hypothetical scenario, a vaccine for the prevention of malaria, single dose with 80% efficacy and protection for life, not needing a booster dose. Suppose that each one of these blue or red figures represents a person [show figure and point to the circle]. The 100 figures inside of this circle represent 100 people who got the vaccine, while the figures outside the circle represent those who did not get the vaccine. The malaria vaccine is not 100% effective; the vaccine is only 80% effective. Thus, of these 100 people who got the malaria vaccine in the circle, 80 people are protected. Blue people inside the circle represent these people. The rest of the people (the red people in the circle) who were vaccinated are not protected, even after taking the vaccine. They remain at risk of catching malaria in the same way as before taking the vaccine or like people who did not get the vaccine. People who receive the malaria vaccine will not know whether the vaccine worked for them. Red people outside the circle, who did not get the vaccine, may actually not have malaria.

We would like to know what you would do if this hypothetical vaccine were available for sale at a convenient location like a clinic, for example. This vaccine could be given to individuals to prevent malaria in the future. It cannot be used by someone who has malaria at the time of vaccination. Pregnant women do not they could get the vaccine. The vaccination schedule comprises a single dose, which can be used in children at from nine months, lasting for the life of the individual. Now I'm going to ask you a few questions to make sure that the information I gave you is clear.

### **CONFERENCE ABOUT CONTEXT UNDERSTANDING**

How is Malaria transmitted?

How can you prevent Malaria?

How effective is the hypothetical vaccine presented for Malaria?

#### **Part I**

“Suppose a vaccine was approved in Brazil to be marketed for the prevention of Malaria. Would you accept to pay to be vaccinated for this product? ”

☐ Yes ☐ No ☐ Does not know ☐ Did not answer

“Suppose this vaccine costs 100.00 BRL. Would you pay for it?”

☐ Yes ☐ No ☐ Don't know ☐ Did not answer

Would you pay it to your son/daughter?

☐ Yes ☐ No ☐ Don't know ☐ Did not answer

If the individual did not accept to pay the price above:

“Would you take this vaccine if it has not any cost?” ☐ Yes ☐ No ☐ Don't know ☐ Did not answer

If the individual answers no:

“Why would not you take the vaccine?”

☐ Safety

☐ Efficacy

☐ Do not take vaccines

Other: \_\_\_\_\_

#### **Part II**

If YES, double until the individual says no:

☐ 200.00 BRL

☐ 400.00 BRL

☐ 800.00 BRL

☐ 1600.00 BRL

☐ 3200.00 BRL

If NO, split until the individual says Yes:

☐ 50.00 BRL

☐ 25.00 BRL

☐ 12.50 BRL

☐ 6.75 BRL

☐ 3.40 BRL

"You said you would pay an amount between  $X_0$  and  $X_1$ . What value do you think is the maximum you would agree paying for this vaccine?" \_\_\_\_\_

### **OPINION RESEARCH**

Birthday: \_\_\_\_/\_\_\_\_/\_\_\_\_

Gender: \_\_\_\_\_

Neighborhood: \_\_\_\_\_

Scholarity: ☐ Never studied ☐ Completed elementary school ☐ incomplete elementary school ☐ incomplete high school ☐ Complete high school ☐ incomplete college ☐ complete college ☐ incomplete postgraduate ☐ complete postgraduate ☐ master ☐ doctor ☐ Don't know ☐ Did not answered

Total income in home:

☐ Until 1 minimum wage ( $\leq 998.00$  BRL)

☐ 1-2 minimum wage (998.01 BRL to 1,996.00 BRL)

☐ 2-3 minimum wage (1,996.01 BRL to 2,994.00 BRL)

☐ 3-5 minimum wage (2,994.01 BRL to 4,990.00 BRL)

☐ 5-10 minimum wage (4,990.01 BRL to 9,980.00 BRL)

☐ 10-20 minimum wage (9,980.01 BRL to 19,960.00 BRL)

☐ more than 20 minimum wage ( $\geq 19,960.01$  BRL)

☐ Don't know ☐ Did not answered

Number of people living in the home: \_\_\_\_\_ (how many people depend of this income?)

☐ Don't know ☐ Did not answered

Working in this moment: ☐ Yes ☐ No ☐ Retired ☐ Don't know ☐ Did not answered

Occupation: \_\_\_\_\_

If Yes, is it autonomous? ☐ Yes ☐ No ☐ Don't know ☐ Did not answered

Children: ☐ No ☐ Yes, how many? \_\_\_\_\_ Age? \_\_\_\_\_ ☐ Don't know ☐ Did not answered

Have private health insurance? ( ) Yes ( ) No ( ) Don't know ( ) Did not answered

**CLINICAL DATA**

Have Malaria? ( ) Yes ( ) No ( ) Don't know ( ) Did not answered

Diagnosed by a healthcare professional? ( ) Yes ( ) No ( ) Don't know ( ) Did not answered

Used system: ( ) Public ( ) Private ( ) Ambos ( ) Don't know ( ) Did not answered

Does anyone who lives in the home have Malaria? ( ) Yes ( ) No ( ) Don't know ( ) Did not answered

Kinship degree: \_\_\_\_\_

**ESCLUSIVE TO INTERVIEWER**

Interviewer: \_\_\_\_\_

Date: \_\_/\_\_/\_\_\_\_

Site: \_\_\_\_\_
